# Supplementary material
Source: PubMed Central journal article supplement (PMC4384662)
Supplement: NIHMS673890-supplement-supplement_1.pdf [file NIHMS673890-supplement-supplement_1.pdf]

**Supplemental Table 1: Class I PI3K isoform alterations in cancer.**

| Alteration Type                         | Cancer Type      | Frequency of Alteration  | Sample Size Range | References    |
|-----------------------------------------|------------------|--------------------------|-------------------|---------------|
| <b>Class IA</b>                         |                  |                          |                   |               |
| <b>PIK3CA (p110<math>\alpha</math>)</b> |                  |                          |                   |               |
| Mutation                                | Endometrial      | 10.3-53.0%               | 29-232            | 1, 2          |
|                                         | Breast           | 7.1-35.5%                | 65-507            | 3-9           |
|                                         | Ovarian (CC)     | 33.0%                    | 97                | 10            |
|                                         | Colorectal       | 16.9 <sup>†</sup> -30.6% | 72-195            | 11, 12        |
|                                         | Bladder          | 5.0-20.0%                | 20-130            | 13-16         |
|                                         | Lung (SCC)       | 20.0%                    | 5                 | 17            |
|                                         | Lung (SQCC)      | 2.9-16.8%                | 35-178            | 17, 18        |
|                                         | Lung (LCC)       | 11.9%                    | 9                 | 17            |
|                                         | Lung (ADC)       | 0.6-4.3%                 | 57-183            | 3, 17, 19, 20 |
|                                         | Cervical         | 13.6%                    | 22                | 2             |
|                                         | Glioblastoma     | 4.3-11.0%                | 91-291            | 21-24         |
|                                         | Head and neck    | 8.1-9.4%                 | 32-74             | 25, 26        |
|                                         | Esophageal       | 5.5%                     | 145               | 27            |
|                                         | Melanoma         | 5.0%                     | 121               | 28            |
|                                         | Prostate         | 1.3-3.6%                 | 55-156            | 3, 29-31      |
|                                         | Sarcoma          | 2.9%                     | 207               | 32            |
|                                         | Renal (CC)       | 1.0-2.9%                 | 98-417            | 33, 34        |
| Liver (HCC)                             | 1.6%             | 125                      | 35                |               |
| Megalencephaly <sup>‡</sup>             | 48.0%            | 50                       | 36                |               |
| Copy number gain/amplification          | Head and neck    | 9.1-100%                 | 11-117            | 37-39         |
|                                         | Cervical         | 9.1-76.4%                | 22-55             | 2, 40         |
|                                         | Lung (SQCC)      | 42.9-69.6%               | 28-52             | 17, 41, 42    |
|                                         | Lung (SCC)       | 33.3-66.7%               | 3-12              | 17, 41        |
|                                         | Lung (LCC)       | 16.7-37.5%               | 6-16              | 17, 41        |
|                                         | Lung (ADC)       | 9.5-19.1%                | 47-74             | 17, 41        |
|                                         | Lung (NSCLC)     | 12.0%                    | 92                | 43            |
|                                         | Lymphoma (MCL)   | 68.2%                    | 22                | 44            |
|                                         | Lymphoma (DLBCL) | 16.7%                    | 60                | 45            |
|                                         | Ovarian          | 39.8%                    | 93                | 46            |
|                                         | Ovarian (Serous) | 13.3-24.3%               | 60-74             | 47, 48        |
|                                         | Gastric          | 36.4%                    | 55                | 49            |
|                                         | Thyroid          | 30.0%                    | 110               | 50            |
|                                         | Prostate         | 28.1%                    | 32                | 16            |
|                                         | Breast           | 8.7-13.4%                | 92-209            | 8, 9          |
|                                         | Glioblastoma     | 1.9-12.2%                | 139-206           | 21, 22        |
|                                         | Endometrial      | 10.3%                    | 29                | 2             |
|                                         | Thyroid          | 9.4%                     | 128               | 51            |
|                                         | Esophageal       | 5.7%                     | 87                | 52            |
|                                         | Leukemia (CLL)   | 5.6%                     | 161               | 53            |
| Increased expression                    | Prostate         | 40.0%                    | 25                | 16            |
| <b>PIK3CB (p110<math>\beta</math>)</b>  |                  |                          |                   |               |
| Mutation                                | Breast           | 0.5%                     | 183               | 3, 54         |
| Copy number gain/amplification          | Lung (SQCC)      | 56.5%                    | 46                | 42            |
|                                         | Thyroid          | 42.3%                    | 97                | 50            |
|                                         | Ovarian          | 5-26.9%                  | NA-93             | 46, 55        |
|                                         | Lymphoma (DLBCL) | 20.0%                    | 60                | 45            |
|                                         | Glioblastoma     | 5.8%                     | 103               | 56            |
| Breast                                  | 4.9-5%           | NA-81                    | 55, 57            |               |

|                                  |                             |                        |         |              |
|----------------------------------|-----------------------------|------------------------|---------|--------------|
| Increased expression             | Prostate                    | 46.7%                  | 30      | 58           |
|                                  | Glioblastoma                | 3.9%                   | 103     | 56           |
| <b>PIK3CD (p110δ)</b>            |                             |                        |         |              |
| Copy number gain                 | Glioblastoma                | 40.0%                  | 10      | 59           |
| Increased expression             | Neuroblastoma               | 52.6%                  | 19      | 60           |
|                                  | Glioblastoma                | 5.8%                   | 103     | 56           |
| <b>PIK3R1 (p85α, p55α, p50α)</b> |                             |                        |         |              |
| Mutation                         | Endometrial                 | 19.8-32.8%             | 108-243 | 1, 61, 62    |
|                                  | Pancreatic                  | 16.7%                  | 6       | 63           |
|                                  | Glioblastoma                | 7.6-11.3%              | 91-291  | 22-24        |
|                                  | Colorectal                  | 4.6 <sup>†</sup> -8.3% | 108-195 | 11, 63       |
|                                  | Melanoma                    | 4.4%                   | 68      | 64           |
|                                  | Ovarian                     | 3.8%                   | 80      | 65           |
|                                  | Esophageal                  | 3.4%                   | 145     | 27           |
|                                  | Breast                      | 1.1-2.8%               | 62-507  | 3, 4, 63, 66 |
|                                  | Colon                       | 1.7%                   | 60      | 65           |
| Decreased expression             | Breast                      | 61.8%                  | 458     | 66           |
|                                  | Prostate                    | 17-75%*                | NA      | 67           |
|                                  | Lung                        | 19-46%*                | NA      | 67           |
|                                  | Ovarian                     | 22%*                   | NA      | 67           |
|                                  | Breast                      | 18%*                   | NA      | 67           |
|                                  | Bladder                     | 18%*                   | NA      | 67           |
| Copy number loss                 | Ovarian                     | 21.5%                  | 93      | 46           |
| <b>PIK3R2 (p85β)</b>             |                             |                        |         |              |
| Mutation                         | Endometrial                 | 4.9%                   | 243     | 61           |
|                                  | Colorectal                  | 0.9%                   | 108     | 63           |
|                                  | Megalencephaly <sup>‡</sup> | 22.0%                  | 50      | 36           |
| Amplification                    | Lymphoma (DLBCL)            | 23.3%                  | 60      | 45           |
| Increased expression             | Colon                       | 55.0%                  | 20      | 68           |
|                                  | Breast                      | 45.7%                  | 35      | 68           |
| <b>PIK3R3 (p55γ)</b>             |                             |                        |         |              |
| Copy number gain                 | Ovarian                     | 15.0%                  | 93      | 46           |
| <b>Class IB</b>                  |                             |                        |         |              |
| <b>PIK3CG (p110γ)</b>            |                             |                        |         |              |
| Copy number gain                 | Ovarian                     | 19.3%                  | 93      | 46           |
| Increased expression             | Breast                      | 77.5%                  | 40      | 69           |
|                                  | Prostate                    | 72.4%                  | 29      | 70           |
|                                  | Medulloblastoma             | 52.9%                  | 17      | 71           |
| <b>PIK3R5 (p101)</b>             |                             |                        |         |              |
| Mutation                         | Melanoma                    | 38.2%                  | 68      | 64           |
|                                  | Gastric                     | 2.7%                   | 37      | 63           |

CC, clear cell; SCC, small cell carcinoma; SQCC, squamous cell carcinoma; ADC, adenocarcinoma; LCC, large cell carcinoma; NSCLC, non-small cell lung carcinoma; MCL, mantle cell lymphoma; CLL, chronic lymphocytic leukemia; DLBCL, diffuse large B cell lymphoma; HCC, hepatocellular carcinoma

<sup>‡</sup> Megalencephaly syndromes are a collection of sporadic overgrowth disorders characterized by enlarged brain size and other distinct features.

<sup>†</sup> Combined number of hypermutated and non-hypermutated colon and colorectal patient samples with mutations in the indicated gene.

\* Represents the percent reduction in gene expression.

NA Sample size not available for this study.

## References:

1. Cancer Genome Atlas Research, N. et al. Integrated genomic characterization of endometrial carcinoma. *Nature* **497**, 67-73 (2013).
2. Miyake, T. et al. PIK3CA gene mutations and amplifications in uterine cancers, identified by methods that avoid confounding by PIK3CA pseudogene sequences. *Cancer Lett* **261**, 120-6 (2008).
3. Kan, Z. et al. Diverse somatic mutation patterns and pathway alterations in human cancers. *Nature* **466**, 869-73 (2010).
4. Cancer Genome Atlas, N. Comprehensive molecular portraits of human breast tumours. *Nature* **490**, 61-70 (2012).
5. Shah, S.P. et al. The clonal and mutational evolution spectrum of primary triple-negative breast cancers. *Nature* **486**, 395-9 (2012).
6. Banerji, S. et al. Sequence analysis of mutations and translocations across breast cancer subtypes. *Nature* **486**, 405-9 (2012).
7. Stephens, P.J. et al. The landscape of cancer genes and mutational processes in breast cancer. *Nature* **486**, 400-4 (2012).
8. Lopez-Knowles, E. et al. PI3K pathway activation in breast cancer is associated with the basal-like phenotype and cancer-specific mortality. *Int J Cancer* **126**, 1121-31 (2010).
9. Wu, G. et al. Somatic mutation and gain of copy number of PIK3CA in human breast cancer. *Breast Cancer Res* **7**, R609-16 (2005).
10. Kuo, K.T. et al. Frequent activating mutations of PIK3CA in ovarian clear cell carcinoma. *Am J Pathol* **174**, 1597-601 (2009).
11. Cancer Genome Atlas, N. Comprehensive molecular characterization of human colon and rectal cancer. *Nature* **487**, 330-7 (2012).
12. Seshagiri, S. et al. Recurrent R-spondin fusions in colon cancer. *Nature* **488**, 660-4 (2012).
13. The Cancer Genome Atlas Research, N. Comprehensive molecular characterization of urothelial bladder carcinoma. *Nature* (2014).
14. Iyer, G. et al. Prevalence and co-occurrence of actionable genomic alterations in high-grade bladder cancer. *J Clin Oncol* **31**, 3133-40 (2013).
15. Guo, G. et al. Whole-genome and whole-exome sequencing of bladder cancer identifies frequent alterations in genes involved in sister chromatid cohesion and segregation. *Nat Genet* **45**, 1459-63 (2013).
16. Agell, L. et al. PI3K signaling pathway is activated by PIK3CA mRNA overexpression and copy gain in prostate tumors, but PIK3CA, BRAF, KRAS and AKT1 mutations are infrequent events. *Mod Pathol* **24**, 443-52 (2011).
17. Okudela, K. et al. PIK3CA mutation and amplification in human lung cancer. *Pathol Int* **57**, 664-71 (2007).
18. Cancer Genome Atlas Research, N. Comprehensive genomic characterization of squamous cell lung cancers. *Nature* **489**, 519-25 (2012).
19. Ding, L. et al. Somatic mutations affect key pathways in lung adenocarcinoma. *Nature* **455**, 1069-75 (2008).
20. Imielinski, M. et al. Mapping the hallmarks of lung adenocarcinoma with massively parallel sequencing. *Cell* **150**, 1107-20 (2012).
21. Kita, D., Yonekawa, Y., Weller, M. & Ohgaki, H. PIK3CA alterations in primary (de novo) and secondary glioblastomas. *Acta Neuropathol* **113**, 295-302 (2007).
22. Cancer Genome Atlas Research, N. Comprehensive genomic characterization defines human glioblastoma genes and core pathways. *Nature* **455**, 1061-8 (2008).
23. Parsons, D.W. et al. An integrated genomic analysis of human glioblastoma multiforme. *Science* **321**, 1807-12 (2008).
24. Brennan, C.W. et al. The somatic genomic landscape of glioblastoma. *Cell* **155**, 462-77 (2013).
25. Stransky, N. et al. The mutational landscape of head and neck squamous cell carcinoma. *Science* **333**, 1157-60 (2011).
26. Agrawal, N. et al. Exome sequencing of head and neck squamous cell carcinoma reveals inactivating mutations in NOTCH1. *Science* **333**, 1154-7 (2011).

27. Dulak, A.M. et al. Exome and whole-genome sequencing of esophageal adenocarcinoma identifies recurrent driver events and mutational complexity. *Nat Genet* **45**, 478-86 (2013).
28. Hodis, E. et al. A landscape of driver mutations in melanoma. *Cell* **150**, 251-63 (2012).
29. Taylor, B.S. et al. Integrative genomic profiling of human prostate cancer. *Cancer Cell* **18**, 11-22 (2010).
30. Baca, S.C. et al. Punctuated evolution of prostate cancer genomes. *Cell* **153**, 666-77 (2013).
31. Barbieri, C.E. et al. Exome sequencing identifies recurrent SPOP, FOXA1 and MED12 mutations in prostate cancer. *Nat Genet* **44**, 685-9 (2012).
32. Barretina, J. et al. Subtype-specific genomic alterations define new targets for soft-tissue sarcoma therapy. *Nat Genet* **42**, 715-21 (2010).
33. Cancer Genome Atlas Research, N. Comprehensive molecular characterization of clear cell renal cell carcinoma. *Nature* **499**, 43-9 (2013).
34. Guo, G. et al. Frequent mutations of genes encoding ubiquitin-mediated proteolysis pathway components in clear cell renal cell carcinoma. *Nat Genet* **44**, 17-9 (2012).
35. Guichard, C. et al. Integrated analysis of somatic mutations and focal copy-number changes identifies key genes and pathways in hepatocellular carcinoma. *Nat Genet* **44**, 694-8 (2012).
36. Riviere, J.B. et al. De novo germline and postzygotic mutations in AKT3, PIK3R2 and PIK3CA cause a spectrum of related megalencephaly syndromes. *Nat Genet* **44**, 934-40 (2012).
37. Fenic, I., Steger, K., Gruber, C., Arens, C. & Woenckhaus, J. Analysis of PIK3CA and Akt/protein kinase B in head and neck squamous cell carcinoma. *Oncol Rep* **18**, 253-9 (2007).
38. Pedrero, J.M. et al. Frequent genetic and biochemical alterations of the PI 3-K/AKT/PTEN pathway in head and neck squamous cell carcinoma. *Int J Cancer* **114**, 242-8 (2005).
39. Woenckhaus, J. et al. Genomic gain of PIK3CA and increased expression of p110alpha are associated with progression of dysplasia into invasive squamous cell carcinoma. *J Pathol* **198**, 335-42 (2002).
40. Ma, Y.Y. et al. PIK3CA as an oncogene in cervical cancer. *Oncogene* **19**, 2739-44 (2000).
41. Massion, P.P. et al. Early involvement of the phosphatidylinositol 3-kinase/Akt pathway in lung cancer progression. *Am J Respir Crit Care Med* **170**, 1088-94 (2004).
42. Massion, P.P. et al. Genomic copy number analysis of non-small cell lung cancer using array comparative genomic hybridization: implications of the phosphatidylinositol 3-kinase pathway. *Cancer Res* **62**, 3636-40 (2002).
43. Kawano, O. et al. PIK3CA gene amplification in Japanese non-small cell lung cancer. *Lung Cancer* **58**, 159-60 (2007).
44. Psyrris, A. et al. Phosphatidylinositol 3'-kinase catalytic subunit alpha gene amplification contributes to the pathogenesis of mantle cell lymphoma. *Clin Cancer Res* **15**, 5724-32 (2009).
45. Cui, W. et al. Frequent copy number variations of PI3K/AKT pathway and aberrant protein expressions of PI3K subunits are associated with inferior survival in diffuse large B cell lymphoma. *J Transl Med* **12**, 10 (2014).
46. Huang, J. et al. Frequent genetic abnormalities of the PI3K/AKT pathway in primary ovarian cancer predict patient outcome. *Genes Chromosomes Cancer* **50**, 606-18 (2011).
47. Nakayama, K. et al. Sequence mutations and amplification of PIK3CA and AKT2 genes in purified ovarian serous neoplasms. *Cancer Biol Ther* **5**, 779-85 (2006).
48. Nakayama, K. et al. Amplicon profiles in ovarian serous carcinomas. *Int J Cancer* **120**, 2613-7 (2007).
49. Byun, D.S. et al. Frequent monoallelic deletion of PTEN and its reciprocal association with PIK3CA amplification in gastric carcinoma. *Int J Cancer* **104**, 318-27 (2003).
50. Liu, Z. et al. Highly prevalent genetic alterations in receptor tyrosine kinases and phosphatidylinositol 3-kinase/akt and mitogen-activated protein kinase pathways in anaplastic and follicular thyroid cancers. *J Clin Endocrinol Metab* **93**, 3106-16 (2008).
51. Wu, G. et al. Uncommon mutation, but common amplifications, of the PIK3CA gene in thyroid tumors. *J Clin Endocrinol Metab* **90**, 4688-93 (2005).
52. Miller, C.T. et al. Gene amplification in esophageal adenocarcinomas and Barrett's with high-grade dysplasia. *Clin Cancer Res* **9**, 4819-25 (2003).
53. Brown, J.R. et al. Integrative genomic analysis implicates gain of PIK3CA at 3q26 and MYC at 8q24 in chronic lymphocytic leukemia. *Clin Cancer Res* **18**, 3791-802 (2012).

54. Dbouk, H.A. et al. Characterization of a tumor-associated activating mutation of the p110beta PI 3-kinase. *PLoS One* **8**, e63833 (2013).
55. Brugge, J., Hung, M.C. & Mills, G.B. A new mutational AKTivation in the PI3K pathway. *Cancer Cell* **12**, 104-7 (2007).
56. Knobbe, C.B. & Reifenberger, G. Genetic alterations and aberrant expression of genes related to the phosphatidylinositol-3'-kinase/protein kinase B (Akt) signal transduction pathway in glioblastomas. *Brain Pathol* **13**, 507-18 (2003).
57. Crowder, R.J. et al. PIK3CA and PIK3CB inhibition produce synthetic lethality when combined with estrogen deprivation in estrogen receptor-positive breast cancer. *Cancer Res* **69**, 3955-62 (2009).
58. Zhu, Q. et al. Phosphoinositide 3-OH kinase p85alpha and p110beta are essential for androgen receptor transactivation and tumor progression in prostate cancers. *Oncogene* **27**, 4569-79 (2008).
59. Mizoguchi, M., Nutt, C.L., Mohapatra, G. & Louis, D.N. Genetic alterations of phosphoinositide 3-kinase subunit genes in human glioblastomas. *Brain Pathol* **14**, 372-7 (2004).
60. Boller, D. et al. Targeting the phosphoinositide 3-kinase isoform p110delta impairs growth and survival in neuroblastoma cells. *Clin Cancer Res* **14**, 1172-81 (2008).
61. Cheung, L.W. et al. High frequency of PIK3R1 and PIK3R2 mutations in endometrial cancer elucidates a novel mechanism for regulation of PTEN protein stability. *Cancer Discov* **1**, 170-85 (2011).
62. Urick, M.E. et al. PIK3R1 (p85alpha) is somatically mutated at high frequency in primary endometrial cancer. *Cancer Res* **71**, 4061-7 (2011).
63. Jaiswal, B.S. et al. Somatic mutations in p85alpha promote tumorigenesis through class IA PI3K activation. *Cancer Cell* **16**, 463-74 (2009).
64. Shull, A.Y. et al. Novel somatic mutations to PI3K pathway genes in metastatic melanoma. *PLoS One* **7**, e43369 (2012).
65. Philp, A.J. et al. The phosphatidylinositol 3'-kinase p85alpha gene is an oncogene in human ovarian and colon tumors. *Cancer Res* **61**, 7426-9 (2001).
66. Cizkova, M. et al. PIK3R1 underexpression is an independent prognostic marker in breast cancer. *BMC Cancer* **13**, 545 (2013).
67. Taniguchi, C.M. et al. The phosphoinositide 3-kinase regulatory subunit p85alpha can exert tumor suppressor properties through negative regulation of growth factor signaling. *Cancer Res* **70**, 5305-15 (2010).
68. Cortes, I. et al. p85beta phosphoinositide 3-kinase subunit regulates tumor progression. *Proc Natl Acad Sci U S A* **109**, 11318-23 (2012).
69. Xie, Y. et al. Identification of upregulated phosphoinositide 3-kinase gamma as a target to suppress breast cancer cell migration and invasion. *Biochem Pharmacol* **85**, 1454-62 (2013).
70. Edling, C.E. et al. Key role of phosphoinositide 3-kinase class IB in pancreatic cancer. *Clin Cancer Res* **16**, 4928-37 (2010).
71. Guerreiro, A.S. et al. A sensitized RNA interference screen identifies a novel role for the PI3K p110gamma isoform in medulloblastoma cell proliferation and chemoresistance. *Mol Cancer Res* **9**, 925-35 (2011).

**Supplemental Table 2: Genetically engineered mouse models of PI3K isoforms in cancer.**

| Genotype                                                                                                                    | Phenotype                                                                                                                          | Ref       |
|-----------------------------------------------------------------------------------------------------------------------------|------------------------------------------------------------------------------------------------------------------------------------|-----------|
| <b>PIK3CA (p110α)</b>                                                                                                       |                                                                                                                                    |           |
| <i>KRas</i> <sup>LA2</sup> ; <i>Pik3ca</i> <sup>RBD/RBD</sup>                                                               | Protected from KRas-induced lung tumors                                                                                            | 1         |
| <i>Rosa26-Cre</i> ; <i>KRas</i> <sup>LA2</sup> ; <i>Pik3ca</i> <sup>RBD/flox</sup>                                          | Partial regression of KRas-induced lung tumors                                                                                     | 2         |
| <i>MMTV-Neu-IRES-Cre</i> ; <i>Pik3ca</i> <sup>flox/flox</sup>                                                               | Protected from Her2/neu-driven mammary tumors                                                                                      | 3         |
| <i>Pb-Cre</i> ; <i>Pten</i> <sup>flox/flox</sup> ; <i>Pik3ca</i> <sup>flox/flox</sup>                                       | No effect on high-grade PIN driven by <i>Pten</i> loss                                                                             | 4         |
| <i>Mx1-Cre</i> ; <i>KRas</i> <sup>G12D</sup> ; <i>Pik3ca</i> <sup>flox/flox</sup>                                           | Protection from MPN induced by oncogenic KRas                                                                                      | 5         |
| <i>Mx1-Cre</i> , <i>LSL-Shp2</i> <sup>GOF/+</sup> ; <i>Pik3ca</i> <sup>flox/flox</sup>                                      | No effect on MPN induced by Shp2 GOF                                                                                               | 6         |
| <i>Pten</i> <sup>-/+</sup> ; <i>Pik3ca</i> <sup>KD/+</sup>                                                                  | Increased endometrial hyperplasia; reduced pheochromocytoma and thyroid tumors                                                     | 7         |
| <i>CCSP-rtTA</i> ; <i>Tet-op-PIK3CA</i> <sup>H1047R</sup>                                                                   | Develop lung tumors within 3 months                                                                                                | 8         |
| <i>MMTV-rtTA</i> ; <i>tetO-PIK3CA</i> <sup>H1047R</sup>                                                                     | Develop mammary tumors within 7 months                                                                                             | 9         |
| <i>MMTV-Cre</i> ; <i>LSL-PIK3CA</i> <sup>H1047R</sup>                                                                       | Surviving mice develop mammary tumors within 7 months                                                                              | 10        |
| <i>MMTV-Cre</i> ; <i>Pik3ca</i> <sup>e20H1047R/+</sup>                                                                      | Develop mammary tumors within 16 months                                                                                            | 11        |
| <i>WAP-Cre</i> ; <i>LSL-PIK3CA</i> <sup>H1047R</sup>                                                                        | Develop mammary tumors within 36 days post-partum                                                                                  | 10        |
| <i>WAP-Cre</i> ; <i>LSL-PIK3CA</i> <sup>E545K</sup>                                                                         | Develop mammary tumors within 80 days post-partum                                                                                  | 12        |
| <i>MMTV-Cre</i> ; <i>p53</i> <sup>flox/+</sup> ; <i>Rosa26-Pik3ca</i> <sup>H1047R</sup>                                     | Develop mammary tumors within 5 months                                                                                             | 13        |
| <i>MMTV-rtTA</i> ; <i>tetO-Cre</i> ; <i>ErbB3</i> <sup>flox/flox</sup> ; <i>tetO-PIK3CA</i> <sup>H1047R</sup>               | Delayed mammary hyperplasia but no effect on mammary tumor formation driven by PIK3CA <sup>H1047R</sup>                            | 14        |
| <i>MMTV-rtTA</i> ; <i>MMTV-Her2</i> ; <i>tetO-PIK3CA</i> <sup>H1047R</sup>                                                  | Accelerated mammary tumor formation and increased lung metastasis compared to <i>Her2</i> or <i>PIK3CA</i> <sup>H1047R</sup> alone | 15        |
| <i>Pten</i> <sup>flox/flox</sup> ; <i>Pik3ca</i> <sup>Lat-H1047R/+</sup>                                                    | Develop ovarian tumors within 16 weeks                                                                                             | 16        |
| <i>Gpa33-CrePR2</i> ; <i>APC</i> <sup>LOF/LOF</sup> ; <i>Pik3ca</i> <sup>Lat-H1047R/+</sup>                                 | Accelerated development of intestinal tumors compared to <i>Pik3ca</i> <sup>H1047R</sup> or <i>APC</i> <sup>LOF</sup> alone        | 17        |
| <i>Fabp1-Cre</i> ; <i>Apc</i> <sup>Min/+</sup> ; <i>Rosa26-Pik3ca</i> *                                                     | Increased number and size of intestinal tumors compared to <i>Pik3ca</i> * or <i>Apc</i> <sup>Min/+</sup> alone                    | 18        |
| <i>Fabp1-Cre</i> ; <i>Apc</i> <sup>flox/+</sup> ; <i>Rosa26-Pik3ca</i> *                                                    | Increased number and size of intestinal tumors compared to <i>Pik3ca</i> * or <i>Apc</i> <sup>flox/+</sup> alone                   | 18        |
| <b>PIK3CB (p110β)</b>                                                                                                       |                                                                                                                                    |           |
| <i>MMTV-Her2/neuT</i> ; <i>Pik3cb</i> <sup>KD/KD</sup>                                                                      | Reduced number of mammary tumors driven by Her2/neuT                                                                               | 19        |
| <i>Pb-Cre</i> ; <i>Pten</i> <sup>flox/flox</sup> ; <i>Pik3cb</i> <sup>flox/flox</sup>                                       | Protection from high-grade PIN driven by <i>Pten</i> loss                                                                          | 4         |
| <i>Pten</i> <sup>-/+</sup> ; <i>Pik3cb</i> <sup>KD/+</sup>                                                                  | Reduced PIN and prostate cancer driven by <i>Pten</i> loss                                                                         | 7         |
| <i>(ARR)2PB-Pik3cb</i> <sup>CA</sup>                                                                                        | Develop VP PIN by 10 weeks and DLP PIN by 60 weeks                                                                                 | 20        |
| <i>MMTV-Neu-IRES-Cre</i> ; <i>Pik3cb</i> <sup>flox/flox</sup>                                                               | Accelerated mammary tumor formation and increased tumor burden driven by Her2/neu                                                  | 3         |
| <b>PIK3CA (p110α) and PIK3CB (p110β)</b>                                                                                    |                                                                                                                                    |           |
| <i>K14-Cre</i> ; <i>Pten</i> <sup>flox/flox</sup> ; <i>Pik3ca</i> <sup>flox/flox</sup> ; <i>Pik3cb</i> <sup>flox/flox</sup> | Loss of ¾ alleles of <i>Pik3ca</i> and <i>Pik3cb</i> blocks skin lesions and mammary hyperplasia driven by <i>Pten</i> loss        | 21,<br>22 |
| <b>PIK3CD (p110δ)</b>                                                                                                       |                                                                                                                                    |           |

|                                                                                                                                                                                  |                                                                                          |    |
|----------------------------------------------------------------------------------------------------------------------------------------------------------------------------------|------------------------------------------------------------------------------------------|----|
| <b>Pik3cd<sup>KD</sup></b>                                                                                                                                                       | Reduced trafficking of NK cells; reduced NK cell extravasation to tumor cells            | 23 |
| <i>Mx1-Cre, LSL-Shp2<sup>GOF/+</sup>; Pik3cd<sup>KD/KD</sup></i>                                                                                                                 | Reduced MPN induced by Shp2 GOF                                                          | 6  |
| <i>Lck-Cre; Pten<sup>flox/flox</sup>; Pik3cd<sup>-/-</sup></i>                                                                                                                   | No effect on development of T-ALL driven by <i>Pten</i> loss                             | 24 |
| <b>PIK3CG (p110γ)</b>                                                                                                                                                            |                                                                                          |    |
| <i>Lck-Cre; Pten<sup>flox/flox</sup>; Pik3cg<sup>-/-</sup></i>                                                                                                                   | No effect on development of T-ALL driven by <i>Pten</i> loss                             | 24 |
| <b>PIK3CD (p110δ) and PIK3CG (p110γ)</b>                                                                                                                                         |                                                                                          |    |
| <i>Lck-Cre; Pten<sup>flox/flox</sup>; Pik3cd<sup>-/-</sup>; Pik3cg<sup>-/-</sup></i>                                                                                             | Delayed development of T-ALL driven by <i>Pten</i> loss                                  | 24 |
| <b>PIK3R1 (p85α, p55α, p50α)</b>                                                                                                                                                 |                                                                                          |    |
| <i>CD19-Cre; Pik3r1<sup>flox/flox</sup></i>                                                                                                                                      | Reduced B-cell leukemia development driven by <i>ex vivo</i> infection with BCR-ABL      | 25 |
| <i>Albumin-Cre; Pik3r1<sup>flox/flox</sup></i>                                                                                                                                   | Develop liver tumors within 20 months                                                    | 26 |
| <i>Pten<sup>-/+</sup>; Pik3r1<sup>-/+</sup></i>                                                                                                                                  | Increased intestinal polyps but no change in PIN driven by <i>Pten</i> loss              | 27 |
| <b>PIK3R2 (p85β)</b>                                                                                                                                                             |                                                                                          |    |
| <i>Pik3r2<sup>-/-</sup></i>                                                                                                                                                      | Decreased number of colon tumors induced by AOM/DSS                                      | 28 |
| <i>Pten<sup>-/+</sup>; Pik3r2<sup>-/-</sup></i>                                                                                                                                  | No change in intestinal polyps or PIN driven by <i>Pten</i> loss                         | 27 |
| <i>CD19-Cre; Pik3r2<sup>-/-</sup></i>                                                                                                                                            | No effect on B-cell leukemia development driven by <i>ex vivo</i> infection with BCR-ABL | 25 |
| <b>PIK3R1 (p85α, p55α, p50α) and PIK3R2 (p85β)</b>                                                                                                                               |                                                                                          |    |
| <i>CCSP-rtTA; tetO-KRas<sup>G12D</sup>; Pik3r1<sup>flox/flox</sup>; Pik3r2<sup>-/-</sup></i><br><i>LSL-KRas<sup>G12D</sup>; Pik3r1<sup>flox/flox</sup>; Pik3r2<sup>-/-</sup></i> | Decreased incidence of lung tumors driven by KRas                                        | 8  |
| <i>CD19-Cre; Pik3r1<sup>flox/flox</sup>; Pik3r2<sup>-/-</sup></i>                                                                                                                | Blocked B-cell leukemia development driven by <i>ex vivo</i> infection with BCR-ABL      | 25 |
| <i>CCSP-rtTA; tetO-KRas<sup>G12D</sup>; Pik3r1<sup>flox/+</sup>; Pik3r2<sup>-/-</sup></i><br><i>LSL-KRas<sup>G12D</sup>; Pik3r1<sup>flox/+</sup>; Pik3r2<sup>-/-</sup></i>       | Increased incidence of lung tumors driven by KRas                                        | 8  |
| <b>PIK3C2A (PI3K-C2α)</b>                                                                                                                                                        |                                                                                          |    |
| <i>Cdh5(PAC)-CreER<sup>T2</sup>; Pik3c2a<sup>flox/flox</sup></i>                                                                                                                 | Decreased microvessel density and tumor burden of implanted tumors                       | 29 |

RBD, Ras binding domain mutant; KD, kinase dead mutant; CA, constitutively active; Tg, transgene; PIN, prostate intraepithelial neoplasia; AOM/DSS, azoxymethane/dextran sodium sulfate; LOF, loss of function; GOF, gain of function; VP, ventral prostate; DLP, dorsal/lateral prostate; MPN, myoproliferative neoplasia

## References:

1. Gupta, S. et al. Binding of ras to phosphoinositide 3-kinase p110alpha is required for ras-driven tumorigenesis in mice. *Cell* **129**, 957-68 (2007).
2. Castellano, E. et al. Requirement for interaction of PI3-kinase p110alpha with RAS in lung tumor maintenance. *Cancer Cell* **24**, 617-30 (2013).
3. Utermark, T. et al. The p110alpha and p110beta isoforms of PI3K play divergent roles in mammary gland development and tumorigenesis. *Genes Dev* **26**, 1573-86 (2012).

4. Jia, S. et al. Essential roles of PI(3)K-p110beta in cell growth, metabolism and tumorigenesis. *Nature* **454**, 776-9 (2008).
5. Gritsman, K. et al. Hematopoiesis and RAS-driven myeloid leukemia differentially require PI3K isoform p110alpha. *J Clin Invest* **124**, 1794-809 (2014).
6. Goodwin, C.B. et al. PI3K p110delta uniquely promotes gain-of-function Shp2-induced GM-CSF hypersensitivity in a model of JMML. *Blood* **123**, 2838-42 (2014).
7. Berenjeno, I.M. et al. Both p110alpha and p110beta isoforms of PI3K can modulate the impact of loss-of-function of the PTEN tumour suppressor. *Biochem J* **442**, 151-9 (2012).
8. Engelman, J.A. et al. Effective use of PI3K and MEK inhibitors to treat mutant Kras G12D and PIK3CA H1047R murine lung cancers. *Nat Med* **14**, 1351-6 (2008).
9. Liu, P. et al. Oncogenic PIK3CA-driven mammary tumors frequently recur via PI3K pathway-dependent and PI3K pathway-independent mechanisms. *Nat Med* **17**, 1116-20 (2011).
10. Meyer, D.S. et al. Luminal expression of PIK3CA mutant H1047R in the mammary gland induces heterogeneous tumors. *Cancer Res* **71**, 4344-51 (2011).
11. Yuan, W. et al. Conditional activation of Pik3ca(H1047R) in a knock-in mouse model promotes mammary tumorigenesis and emergence of mutations. *Oncogene* **32**, 318-26 (2013).
12. Meyer, D.S. et al. Expression of PIK3CA mutant E545K in the mammary gland induces heterogeneous tumors but is less potent than mutant H1047R. *Oncogenesis* **2**, e74 (2013).
13. Adams, J.R. et al. Cooperation between Pik3ca and p53 mutations in mouse mammary tumor formation. *Cancer Res* **71**, 2706-17 (2011).
14. Young, C.D. et al. Conditional loss of ErbB3 delays mammary gland hyperplasia induced by mutant PIK3CA without affecting mammary tumor latency, gene expression, or signaling. *Cancer Res* **73**, 4075-85 (2013).
15. Hanker, A.B. et al. Mutant PIK3CA accelerates HER2-driven transgenic mammary tumors and induces resistance to combinations of anti-HER2 therapies. *Proc Natl Acad Sci U S A* **110**, 14372-7 (2013).
16. Kinross, K.M. et al. An activating Pik3ca mutation coupled with Pten loss is sufficient to initiate ovarian tumorigenesis in mice. *J Clin Invest* **122**, 553-7 (2012).
17. Hare, L.M. et al. Physiological expression of the PI3K-activating mutation Pik3ca(H1047R) combines with Apc loss to promote development of invasive intestinal adenocarcinomas in mice. *Biochem J* **458**, 251-8 (2014).
18. Deming, D.A. et al. PIK3CA and APC mutations are synergistic in the development of intestinal cancers. *Oncogene* **33**, 2245-54 (2014).
19. Ciruolo, E. et al. Phosphoinositide 3-kinase p110beta activity: key role in metabolism and mammary gland cancer but not development. *Sci Signal* **1**, ra3 (2008).
20. Lee, S.H. et al. A constitutively activated form of the p110beta isoform of PI3-kinase induces prostatic intraepithelial neoplasia in mice. *Proc Natl Acad Sci U S A* **107**, 11002-7 (2010).
21. Wang, Q. et al. Spatially distinct roles of class Ia PI3K isoforms in the development and maintenance of PTEN hamartoma tumor syndrome. *Genes Dev* **27**, 1568-80 (2013).
22. Wang, Q., Weisberg, E. & Zhao, J.J. The gene dosage of class Ia PI3K dictates the development of PTEN hamartoma tumor syndrome. *Cell Cycle* **12**, 3589-93 (2013).
23. Saudemont, A. et al. p110gamma and p110delta isoforms of phosphoinositide 3-kinase differentially regulate natural killer cell migration in health and disease. *Proc Natl Acad Sci U S A* **106**, 5795-800 (2009).
24. Subramaniam, P.S. et al. Targeting nonclassical oncogenes for therapy in T-ALL. *Cancer Cell* **21**, 459-72 (2012).



25. Kharas, M.G. et al. Ablation of PI3K blocks BCR-ABL leukemogenesis in mice, and a dual PI3K/mTOR inhibitor prevents expansion of human BCR-ABL+ leukemia cells. *J Clin Invest* **118**, 3038-50 (2008).
26. Taniguchi, C.M. et al. The phosphoinositide 3-kinase regulatory subunit p85alpha can exert tumor suppressor properties through negative regulation of growth factor signaling. *Cancer Res* **70**, 5305-15 (2010).
27. Luo, J. et al. Modulation of epithelial neoplasia and lymphoid hyperplasia in PTEN+/- mice by the p85 regulatory subunits of phosphoinositide 3-kinase. *Proc Natl Acad Sci U S A* **102**, 10238-43 (2005).
28. Cortes, I. et al. p85beta phosphoinositide 3-kinase subunit regulates tumor progression. *Proc Natl Acad Sci U S A* **109**, 11318-23 (2012).
29. Yoshioka, K. et al. Endothelial PI3K-C2alpha, a class II PI3K, has an essential role in angiogenesis and vascular barrier function. *Nat Med* **18**, 1560-9 (2012).

**Supplemental Table 3: Combination of PI3K inhibitors with other targeted therapies in the clinic.**

| Agent                                    | Company                     | Target        | Combination therapy trials |                      |                                 |                            |
|------------------------------------------|-----------------------------|---------------|----------------------------|----------------------|---------------------------------|----------------------------|
|                                          |                             |               | Agent                      | Target               | Tumor types*                    | Clinical trial*            |
| <b>Class I pan-PI3K inhibitors</b>       |                             |               |                            |                      |                                 |                            |
| <b>BKM120</b>                            | Novartis                    | Class I PI3Ks | ▪ Lapatinib                | ▪ EGFR/HER2          | ▪ Breast                        | NCT01589861                |
|                                          |                             |               | ▪ Fulvestrant              | ▪ ER                 |                                 | NCT01339442                |
|                                          |                             |               | ▪ Trastuzumab              | ▪ HER2               |                                 | NCT01132664                |
|                                          |                             |               | ▪ Letrozole                | ▪ Aromatase          |                                 | NCT01248494                |
|                                          |                             |               | ▪ Gefitinib                | ▪ EGFR               | ▪ NSCLC                         | NCT01570296                |
|                                          |                             |               | ▪ Erlotinib                | ▪ EGFR               |                                 | NCT01487265                |
|                                          |                             |               | ▪ Panitumumab              | ▪ EGFR               | ▪ Colorectal                    | NCT01591421                |
|                                          |                             |               | ▪ Cetuximab                | ▪ EGFR               | ▪ Head and neck                 | NCT01816984                |
|                                          |                             |               | ▪ Bevacizumab              | ▪ VEGFR <sup>†</sup> | ▪ GBM<br>▪ Renal cell           | NCT01349660<br>NCT01283048 |
|                                          |                             |               | ▪ INC280                   | ▪ c-MET              | ▪ GBM                           | NCT01870726                |
|                                          |                             |               | ▪ Rituximab                | ▪ CD20               | ▪ B cell lymphoma               | NCT02049541                |
|                                          |                             |               | ▪ Imatinib                 | ▪ BCR-ABL            | ▪ GIST                          | NCT01468688                |
|                                          |                             |               | ▪ Vemurafenib              | ▪ BRAF               | ▪ Melanoma                      | NCT01512251                |
|                                          |                             |               | ▪ Encorafenib              | ▪ BRAF               |                                 | NCT01820364                |
|                                          |                             |               | ▪ Olaparib                 | ▪ PARP               | ▪ TNBC<br>▪ Ovarian             | NCT01623349                |
|                                          |                             |               | ▪ Abiraterone acetate      | ▪ CYP17              | ▪ Prostate                      | NCT01634061                |
|                                          |                             |               | ▪ Erismodegib              | ▪ Smoothened         | ▪ Adv. solid tumors             | NCT01576666                |
| ▪ Trametinib                             | ▪ MEK1/2                    |               | NCT01155453                |                      |                                 |                            |
| ▪ MEK162                                 | ▪ MEK1/2                    |               | NCT01363232                |                      |                                 |                            |
| ▪ Everolimus                             | ▪ mTOR                      |               | NCT01470209                |                      |                                 |                            |
| <b>GDC0941</b>                           | Genentech                   | Class I PI3Ks | ▪ Fulvestrant              | ▪ ER                 | ▪ Breast                        | NCT01437566                |
|                                          |                             |               | ▪ Trastuzumab              | ▪ HER2               |                                 | NCT00928330                |
|                                          |                             |               | ▪ Bevacizumab              | ▪ VEGFR <sup>†</sup> | ▪ Breast<br>▪ NSCLC             | NCT00960960<br>NCT00974584 |
|                                          |                             |               | ▪ Erlotinib                | ▪ EGFR               | ▪ Adv. solid tumors             | NCT00975182                |
| ▪ Cobimetinib                            | ▪ MEK1                      |               | NCT00996892                |                      |                                 |                            |
| <b>PX866</b>                             | Oncothyreon                 | Class I PI3Ks | ▪ Cetuximab                | ▪ EGFR               | ▪ Colorectal<br>▪ SCCHN         | NCT01252628<br>NCT01252628 |
|                                          |                             |               | ▪ Vemurafenib              | ▪ BRAF               | ▪ Melanoma                      | NCT01616199                |
|                                          |                             |               | ▪ Trastuzumab              | ▪ HER2               | ▪ Breast                        | NCT01042925                |
| <b>XL147</b>                             | Exelixis/<br>Sanofi-Aventis | Class I PI3Ks | ▪ Letrozole                | ▪ Aromatase          |                                 | NCT01082068                |
|                                          |                             |               | ▪ Erlotinib                | ▪ EGFR               | ▪ Adv. solid tumors             | NCT00692640                |
|                                          |                             |               | ▪ MM121                    | ▪ HER3               |                                 | NCT00704392                |
|                                          |                             |               | ▪ XL647                    | ▪ RTKs               |                                 | NCT01436565                |
| <b>Isoform-selective PI3K inhibitors</b> |                             |               |                            |                      |                                 |                            |
| <b>BYL719</b>                            | Novartis                    | p110 $\alpha$ | ▪ Cetuximab                | ▪ EGFR               | ▪ SCCHN                         | NCT01602315                |
|                                          |                             |               | ▪ LJM716                   | ▪ HER3               | ▪ ESCC                          | NCT01822613                |
|                                          |                             |               | ▪ Encorafenib              | ▪ BRAF               | ▪ Colorectal                    | NCT01719380                |
|                                          |                             |               | ▪ Cetuximab                | ▪ EGFR               |                                 |                            |
|                                          |                             |               | ▪ Fulvestrant              | ▪ ER                 | ▪ Breast<br>▪ Adv. solid tumors | NCT02088684<br>NCT01219699 |
|                                          |                             |               | ▪ Imatinib                 | ▪ BCR-ABL            | ▪ GIST                          | NCT01735968                |
|                                          |                             |               | ▪ Letrozole                | ▪ Aromatase          | ▪ Breast                        | NCT01870505                |
|                                          |                             |               | ▪ Exemestane               | ▪ Aromatase          |                                 | NCT01870505                |
|                                          |                             |               | ▪ TDM-1                    | ▪ HER2 <sup>‡</sup>  |                                 | NCT02038010                |
|                                          |                             |               | ▪ LEE011                   | ▪ CDK4/6             |                                 | NCT02088684                |
|                                          |                             |               | ▪ Everolimus               | ▪ mTOR               | ▪ Breast                        | NCT02077933                |
|                                          |                             |               | ▪ Exemestane               | ▪ Aromatase          | ▪ Kidney<br>▪ Pancreas          |                            |
|                                          |                             |               | ▪ AUY922                   | ▪ HSP90              | ▪ Gastric                       | NCT01613950                |
|                                          |                             |               | ▪ Ganitumab                | ▪ IGF1R              | ▪ Adv. solid tumors             | NCT01708161                |
| ▪ BGJ398                                 | ▪ FGFR                      |               | NCT01928459                |                      |                                 |                            |
| ▪ MEK162                                 | ▪ MEK1/2                    |               | NCT01449058                |                      |                                 |                            |
| <b>GDC0032</b>                           | Genentech                   | p110 $\alpha$ | ▪ Letrozole                | ▪ Aromatase          | ▪ Breast                        | NCT01296555                |
|                                          |                             |               | ▪ Fulvestrant              | ▪ ER                 |                                 |                            |
| <b>INK1117</b>                           | Intellikine/                | p110 $\alpha$ | ▪ MLN0128                  | ▪ mTORC1/2           | ▪ Adv. non-                     | NCT01899053                |

| Millenium                                |                 |                                 | hematological malignancies |                      |                                                 |                            |
|------------------------------------------|-----------------|---------------------------------|----------------------------|----------------------|-------------------------------------------------|----------------------------|
| <b>SAR260301</b>                         | Sanofi          | p110 $\beta$                    | ▪ Vemurafenib              | ▪ BRAF               | ▪ Melanoma                                      | NCT01673737                |
| <b>IPI145</b>                            | Infinity        | p110 $\delta$ and p110 $\gamma$ | ▪ Ofatumumab               | ▪ CD20               | ▪ CLL                                           | NCT02049515                |
|                                          |                 |                                 | ▪ Rituximab                | ▪ CD20               | ▪ Hematologic malignancies                      | NCT01871675                |
| <b>AMG319</b>                            | Amgen           | p110 $\delta$                   | NCT01300026                |                      |                                                 |                            |
| <b>CAL101 (GS101)</b>                    | Gilead Sciences | p110 $\delta$                   | ▪ Rituximab                | ▪ CD20               | ▪ INHL                                          | NCT01088048                |
|                                          |                 |                                 | ▪ Ofatumumab               | ▪ CD20               | ▪ CLL                                           |                            |
|                                          |                 |                                 | ▪ Everolimus               | ▪ mTOR               | ▪ MCL                                           |                            |
|                                          |                 |                                 | ▪ Bortezomib               | ▪ NF $\kappa$ B      |                                                 |                            |
|                                          |                 |                                 | ▪ GS9973                   | ▪ SYK                | ▪ Hematologic malignancies                      | NCT01796470                |
|                                          |                 |                                 | ▪ Everolimus               | ▪ mTOR               | ▪ MCL                                           | NCT01088048                |
| <b>Dual pan-PI3K and mTOR inhibitors</b> |                 |                                 |                            |                      |                                                 |                            |
| <b>GDC0980</b>                           | Genentech       | PI3K and mTOR                   | ▪ Fulvestrant              | ▪ ER                 | ▪ Breast                                        | NCT01437566                |
|                                          |                 |                                 | ▪ Abiraterone acetate      | ▪ CYP17              | ▪ Prostate                                      | NCT01485861                |
|                                          |                 |                                 | ▪ Bevacizumab              | ▪ VEGFR <sup>†</sup> | ▪ Breast<br>▪ Adv. solid tumors                 | NCT01254526<br>NCT01332604 |
| <b>PF04691502</b>                        | Pfizer          | PI3K and mTOR                   | ▪ PD0325901                | ▪ MEK                | ▪ Adv. solid tumors                             | NCT01347866                |
| <b>BEZ235</b>                            | Novartis        | PI3K and mTOR                   | ▪ Trastuzumab              | ▪ HER2               | ▪ Breast<br>▪ Adv. solid tumors                 | NCT01471847<br>NCT01285466 |
|                                          |                 |                                 | ▪ Everolimus               | ▪ mTOR               | ▪ Breast<br>▪ Renal cell<br>▪ Adv. solid tumors | NCT01482156<br>NCT01508104 |
|                                          |                 |                                 | ▪ Abiraterone acetate      | ▪ CYP17              | ▪ Prostate                                      | NCT01717898                |
|                                          |                 |                                 | ▪ Letrozole                | ▪ Aromatase          | ▪ Breast                                        | NCT01248494                |
|                                          |                 |                                 | ▪ Everolimus               | ▪ mTOR               | ▪ Adv. solid tumors                             | NCT01482156                |
|                                          |                 |                                 | ▪ MEK162                   | ▪ MEK                |                                                 | NCT01337765                |
| <b>XL765</b>                             | Sanofi          | PI3K and mTOR                   | ▪ Letrozole                | ▪ Aromatase          | ▪ Breast                                        | NCT01082068                |
|                                          |                 |                                 | ▪ Erlotinib                | ▪ EGFR               | ▪ Adv. solid tumors                             | NCT00777699                |
| <b>PF05212384</b>                        | Pfizer          | PI3K and mTOR                   | ▪ PD0325901                | ▪ MEK                | ▪ Adv. solid tumors                             | NCT01347866                |
|                                          |                 |                                 | ▪ Cetuximab                | ▪ EGFR               | ▪ Colorectal cancer                             | NCT01925274                |
|                                          |                 |                                 | ▪ Bevacizumab              | ▪ VEGFR              | ▪ Colorectal cancer                             | NCT01937715                |

\* Data taken from an April 2014 search of <http://www.clinicaltrials.gov>.

<sup>†</sup> Bevacizumab is a monoclonal antibody targeting VEGF that prevents signaling through VEGFR.

<sup>‡</sup> T-DM1 is a conjugate of the cytotoxic agent mertansine (DM1) to the monoclonal antibody Trastuzumab targeting HER2.

TNBC, triple-negative breast cancer; GIST, gastrointestinal stromal tumor; NSCLC, non-small cell lung carcinoma; ESCC, esophageal squamous cell carcinoma; SCCHN, squamous cell carcinoma of the head and neck; sqNSCLC, squamous non-small cell lung cancer; TCC, transitional cell carcinoma; INHL, indolent non-Hodgkin lymphoma; MCL, mantle cell lymphoma; CLL, chronic lymphocytic leukemia; SLL, small lymphocytic leukemia; ALL, acute lymphoblastic leukemia; AML, acute myeloid leukemia; CML, chronic myelogenous leukemia; MM, multiple myeloma; CRPC, castration-resistant prostate cancer; GBM, glioblastoma multiforme
